# Supplementary material for: Photoaccelerated energy transfer catalysis of the Suzuki–Miyaura coupling through ligand regulation on Ir(iii)–Pd(ii) bimetallic complexes
Source: Royal Society of Chemistry journal article supplement (doi:10.1039/d0ra08547b), 2020-01-01
Supplement: d0ra08547b1.pdf [file d0ra08547b1.pdf]

## Supporting Information

for

### *Photoacceleration of the Suzuki-Miyaura coupling through ligand-regulation on Ir(III)-Pd(II) bimetallic complexes*

Su-Yang Yao<sup>a</sup>, Xiu-Lian Zhang<sup>a</sup>, and Man-Li Cao<sup>\*a</sup>

<sup>a</sup>Department of Chemistry, Guangdong University of Education, Guangzhou 510303, China.

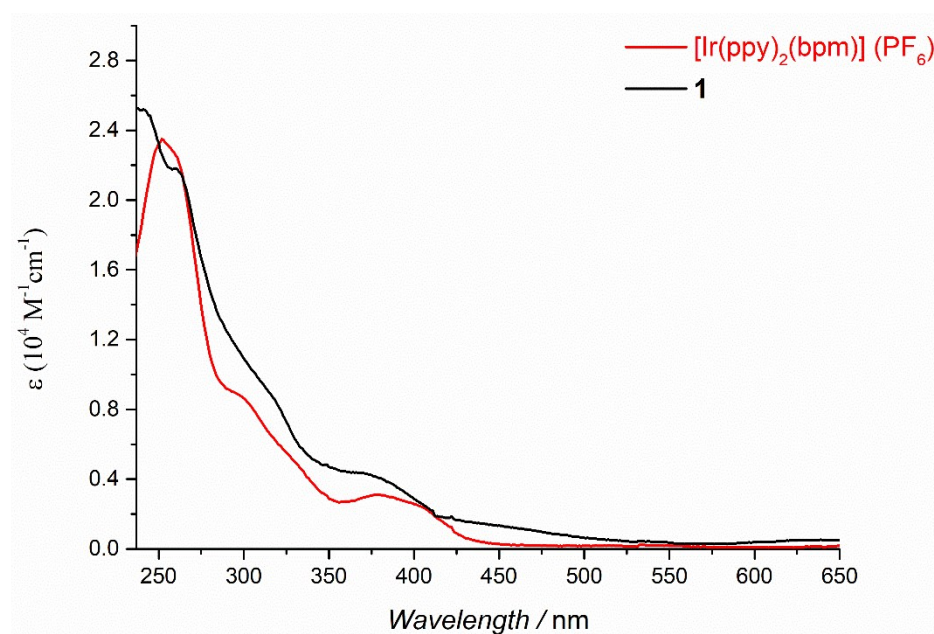

**Figure S1.** UV-vis spectra of  $[\text{Ir}(\text{ppy})_2(\text{bpm})](\text{PF}_6)$  and **1** in DCM solution ( $5 \times 10^{-5} \text{ M}$ ).

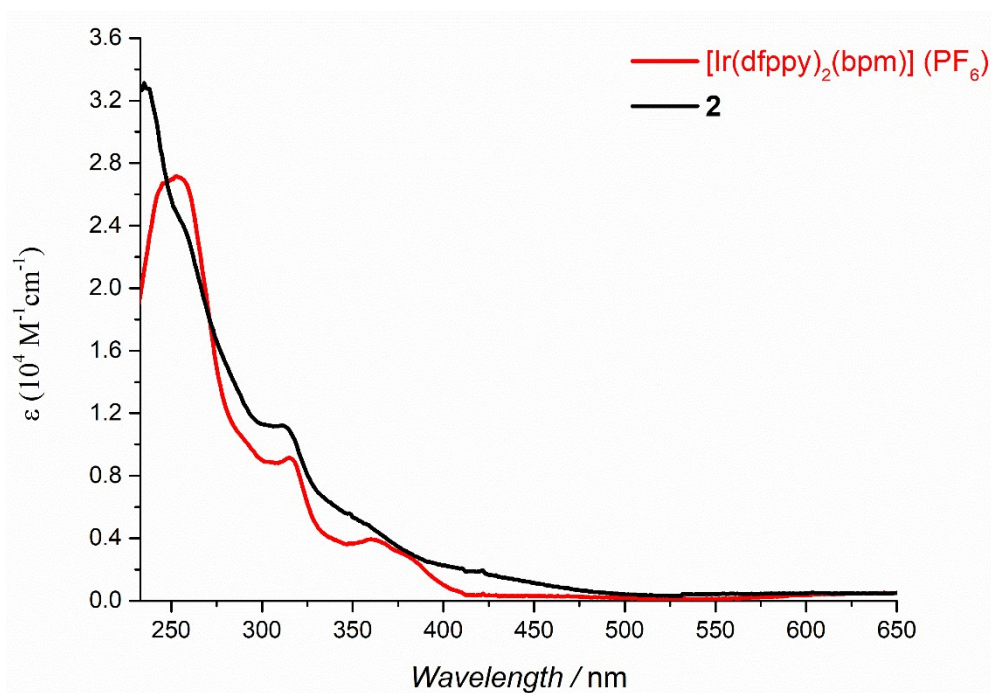

**Figure S2.** UV-vis spectra of  $[\text{Ir}(\text{dfppy})_2(\text{bpm})](\text{PF}_6)$  and **2** in DCM solution ( $5 \times 10^{-5} \text{ M}$ ).

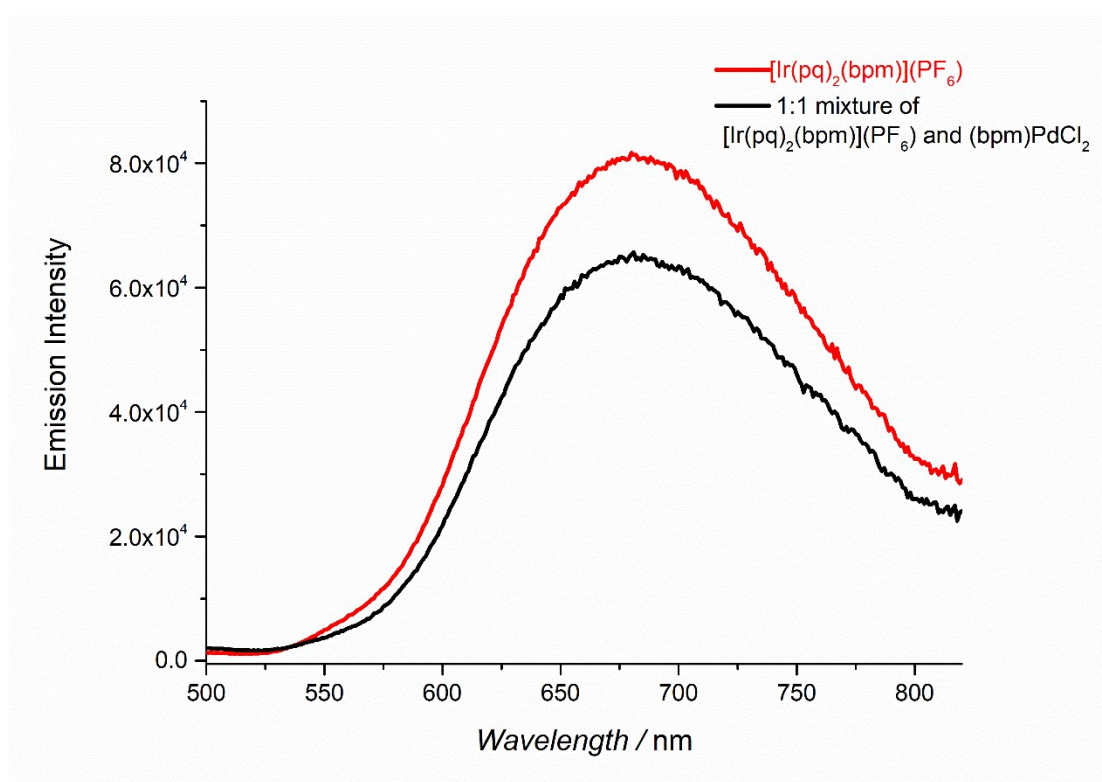

**Figure S3.** Emission spectra of a mixture of  $[\text{Ir}(\text{pq})_2(\text{bpm})](\text{PF}_6)$  and  $(\text{bpm})\text{PdCl}_2$  (1:1,  $2 \times 10^{-4} \text{ M}$ , DCM solution). Excitation wavelength: 405 nm.

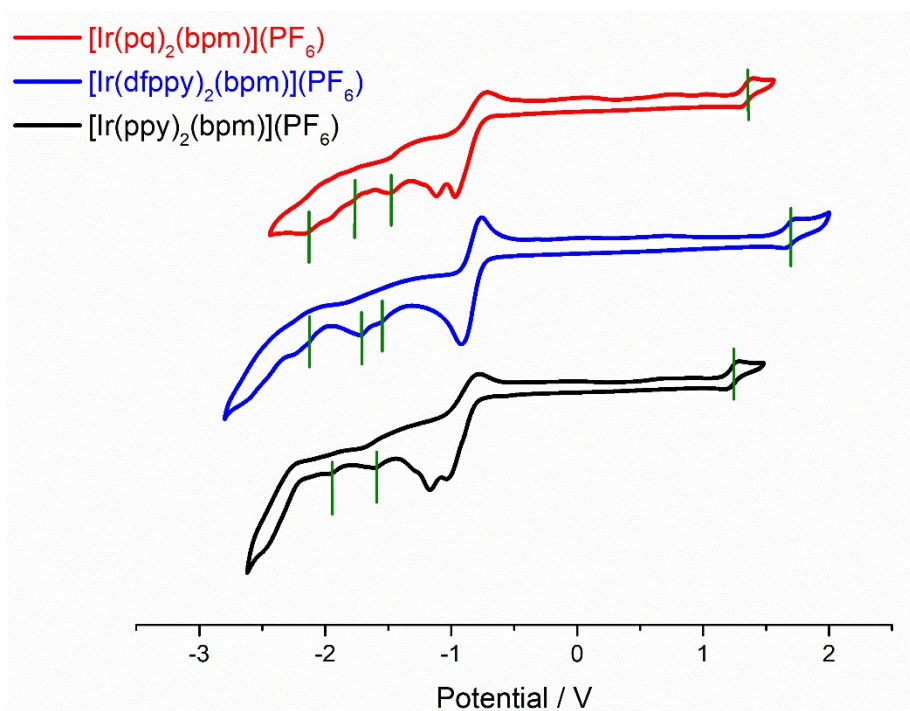

**Figure S4.** Cyclic voltammograms of mononuclear Ir(III) complexes.

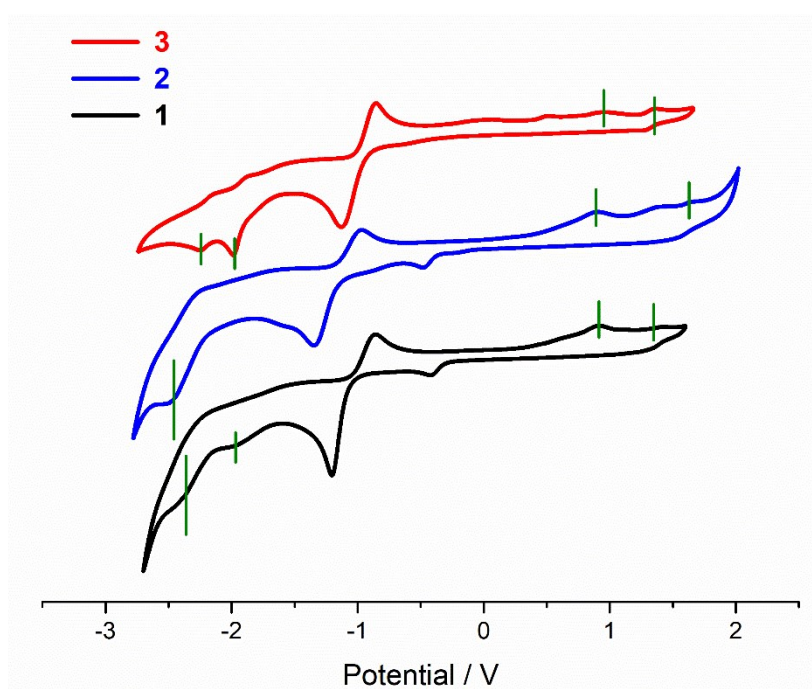

**Figure S5.** Cyclic voltammograms of Ir-Pd complexes.

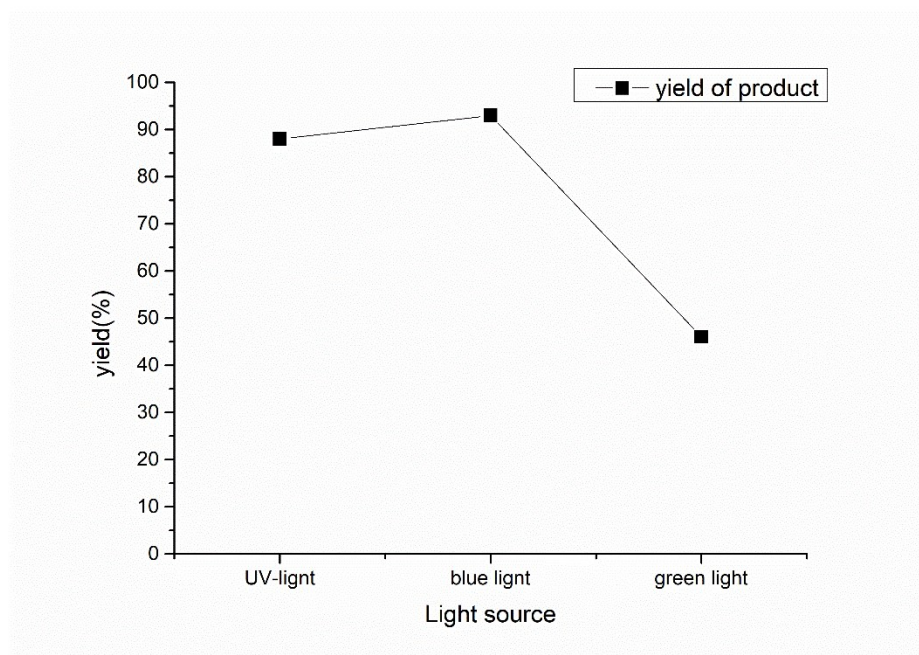

**Figure S6.** Action spectrum of complex **3**.

**Computational Details:** DFT calculations were performed using the Gaussian 09W software.<sup>1</sup> Optimization of ground-state structures was performed by using DFT with the B3LYP functional. The LanL2DZ<sup>2a-c</sup> and 6-31G(d,p)<sup>2d,e</sup> basis sets were used to treat iridium and all other atoms, respectively.

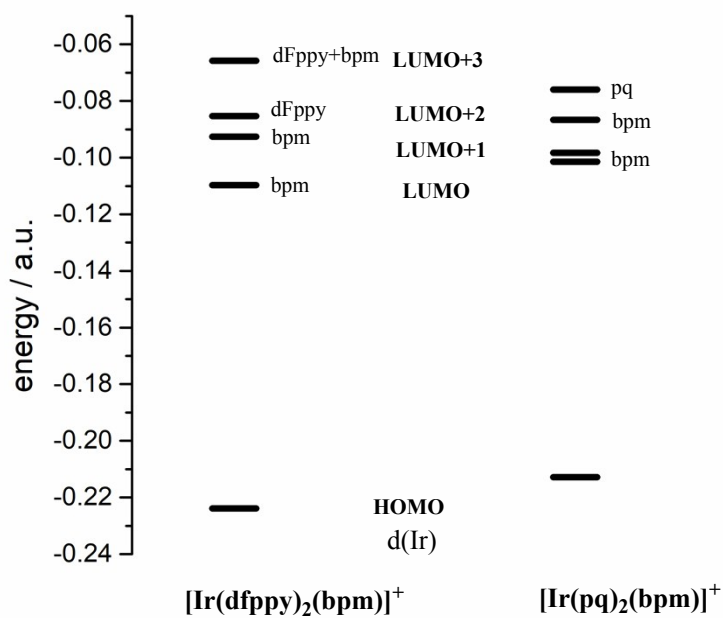

**Scheme S1.** The energy levels of the frontier orbitals for [Ir(dfppy)<sub>2</sub>(bpm)]<sup>+</sup> and [Ir(pq)<sub>2</sub>(bpm)]<sup>+</sup>.

**<sup>1</sup>H NMR of catalytical product.**

**4-Methylbiphenyl:** <sup>1</sup>H NMR (400 MHz, Chloroform-*d*) δ 7.62 (d, *J* = 7.9 Hz, 2H), 7.54 (d, *J* = 8.1 Hz, 2H), 7.47 (t, 2H), 7.36 (t, *J* = 7.4 Hz, 1H), 7.29 (d, *J* = 7.6 Hz, 2H), 2.44 (s, 3H).

**1-(Biphenyl-4-yl)ethanone:** <sup>1</sup>H NMR (400 MHz, Chloroform-*d*) δ 8.06 (d, *J* = 8.5 Hz, 1H), 7.71 (d, *J* = 8.5 Hz, 2H), 7.66 (d, *J* = 7.1 Hz, 2H), 7.50 (t, 2H), 7.43 (t, 1H), 2.67 (s, 3H).

**2-Methylbiphenyl:** <sup>1</sup>H NMR (400 MHz, Chloroform-*d*) δ 7.45 (t, 2H), 7.40 – 7.35 (m, 3H), 7.29 (dd, *J* = 7.3, 3.3 Hz, 4H), 2.31 (s, 3H).

**3-Methylbiphenyl:** <sup>1</sup>H NMR (400 MHz, Chloroform-*d*) δ 7.63 (d, *J* = 7.1 Hz, 2H), 7.46 (q, *J* = 9.0, 8.1 Hz, 4H), 7.41 – 7.35 (m, 2H), 7.21 (d, *J* = 7.5 Hz, 1H), 2.47 (s, 3H).

**4-Fluoro-4'-methylbiphenyl:** <sup>1</sup>H NMR (400 MHz, Chloroform-*d*) δ 7.56 (dd, *J* = 8.9, 5.4 Hz, 2H), 7.47 (d, *J* = 8.1 Hz, 2H), 7.28 (d, *J* = 7.8 Hz, 2H), 7.14 (t, 2H), 2.43 (s, 3H).

**4-(*p*-Methoxyphenyl)toluene:** <sup>1</sup>H NMR (400 MHz, Chloroform-*d*) δ 7.55 (d, *J* = 8.8 Hz, 2H), 7.49 (d, *J* = 8.1 Hz, 2H), 7.29 – 7.24 (m, 2H), 7.00 (d, *J* = 8.8 Hz, 2H), 3.88 (s, 3H).

**2-Methoxy-1,1'-binaphthyl:**  $^1\text{H}$  NMR (400 MHz, Chloroform-*d*)  $\delta$  8.06 – 8.00 (m, 2H), 7.99 (d,  $J = 4.1$  Hz, 1H), 7.93 (d,  $J = 8.2$  Hz, 1H), 7.68 (t, 1H), 7.50 (d,  $J = 8.5$  Hz, 3H), 7.42 – 7.20 (m, 5H), 3.81 (s, 3H).

**3,5-Dimethyl-1,1'-biphenyl:**  $^1\text{H}$  NMR (400 MHz,  $\text{CDCl}_3$ )  $\delta$  7.63 (d,  $J = 8.3$  Hz, 2H), 7.52 – 7.43 (m, 2H), 7.42 – 7.34 (m, 1H), 7.26 (d,  $J = 1.6$  Hz, 2H), 7.09 (s, 1H), 2.43 (s, 6H).

**2-Methyl-1-phenyl-naphthalene:**  $^1\text{H}$  NMR (400 MHz,  $\text{CDCl}_3$ )  $\delta$  7.87 (d,  $J = 7.5$  Hz, 1H), 7.81 (d,  $J = 8.4$  Hz, 1H), 7.53 (t,  $J = 7.3$  Hz, 2H), 7.49 – 7.40 (m, 4H), 7.38 – 7.29 (m, 3H), 2.27 (s, 3H).

**2-Methyl-1-(3,5-dimethyl-phenyl)-naphthalene:**  $^1\text{H}$  NMR (400 MHz,  $\text{CDCl}_3$ )  $\delta$  7.86 (d,  $J = 8.0$  Hz, 1H), 7.80 (d,  $J = 8.4$  Hz, 1H), 7.52 – 7.33 (m, 4H), 7.10 (s, 1H), 6.92 (s, 2H), 2.42 (s, 6H), 2.29 (s, 3H).

**1-Phenylnaphthalene:**  $^1\text{H}$  NMR (400 MHz,  $\text{CDCl}_3$ )  $\delta$  7.94 (d,  $J = 8.2$  Hz, 2H), 7.89 (d,  $J = 8.2$  Hz, 1H), 7.59 – 7.42 (m, 9H).

**2-Methyl-1,1'-binaphthalene:**  $^1\text{H}$  NMR (400 MHz,  $\text{CDCl}_3$ )  $\delta$  7.97 (d,  $J = 8.2$  Hz, 2H), 7.89 (d,  $J = 8.4$  Hz, 2H), 7.66 – 7.60 (m, 1H), 7.54 – 7.46 (m, 2H), 7.40 (t, 2H), 7.33 – 7.14 (m, 4H), 2.13 (s, 3H).

- 1 M. J. Frisch, G. W. Trucks, H. B. Schlegel, G. E. Scuseria, M. A. Robb, J. R. Cheeseman, G. Scalmani, V. Barone, B. Mennucci, G. A. Petersson, H. Nakatsuji, M. Caricato, X. Li, H. P. Hratchian, A. F. Izmaylov, J. Bloino, G. Zheng, J. L. Sonnenberg, M. Hada, M. Ehara, K. Toyota, R. Fukuda, J. Hasegawa, M. Ishida, T. Nakajima, Y. Honda, O. Kitao, H. Nakai, T. Vreven, J. A. Jr. Montgomery, J. E. Peralta, F. Ogliaro, M. Bearpark, J. J. Heyd, E. Brothers, K. N. Kudin, V. N. Staroverov, R. Kobayashi, J. Normand, K. Raghavachari, A. Rendell, J. C. Burant, S. S. Iyengar, J. Tomasi, M. Cossi, N. Rega, N. J. Millam, M. Klene, J. E. Knox, J. B. Cross, V. Bakken, C. Adamo,

J. Jaramillo, R. Gomperts, R. E. Stratmann, O. Yazyev, A. J. Austin, R. Cammi, C. Pomelli, J. W. Ochterski, R. L. Martin, K. Morokuma, V. G. Zakrzewski, G. A. Voth, P. Salvador, J. J. Dannenberg, S. Dapprich, A. D. Daniels, Ö. Farkas, J. B. Foresman, J. V. Ortiz, J. Cioslowski and D. J. Fox, Gaussian 09, revision A.1; Gaussian, Inc.: Wallingford, CT, 2009.

- 2 (a) P. J. Hay and R. W. Wadt, *J. Chem. Phys.* 1985, **82**, 270-283; (b) R. W. Wadt and P. J. Hay, *J. Chem. Phys.* 1985, **82**, 284-298; (c) P. J. Hay and R. W. Wadt, *J. Chem. Phys.* 1985, **82**, 299-310; (d) A. D. Becke, *J. Chem. Phys.* 1993, **98**, 5648-5652; (e) C. Lee, W. Yang and R. G. Parr, *Phys. Rev. B: Condens. Matter.* 1998, **37**, 785-789.
